# Supplementary material
Source: PubMed Central journal article supplement (PMC60099)

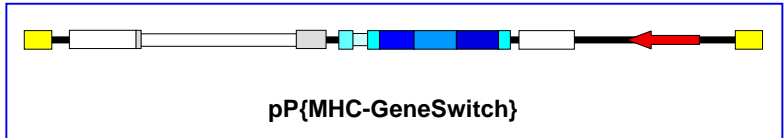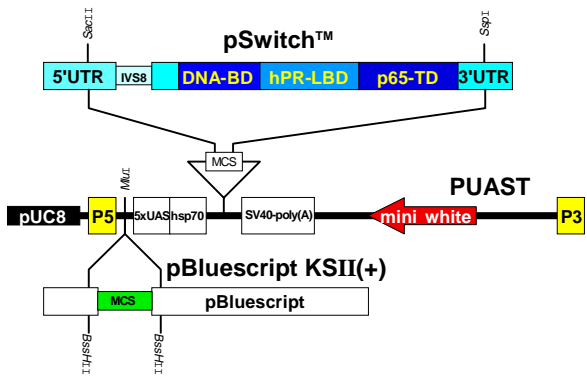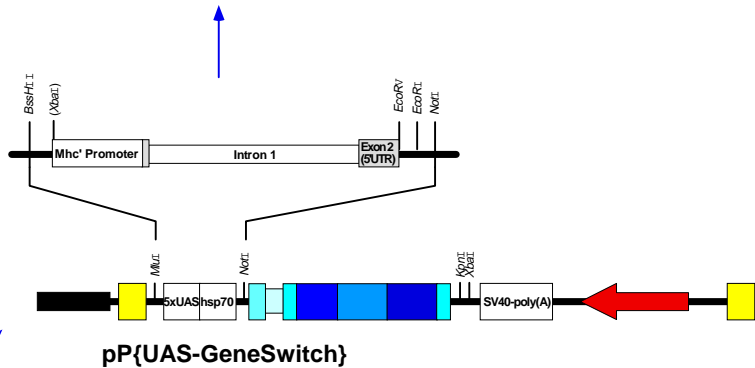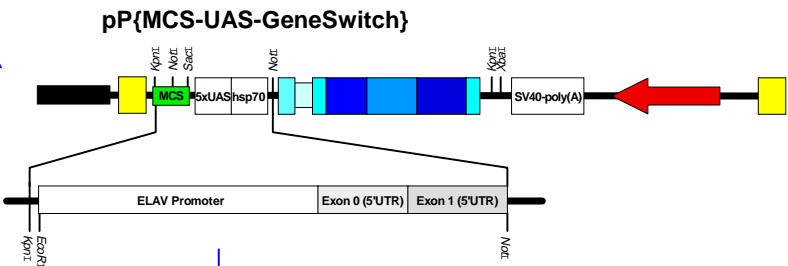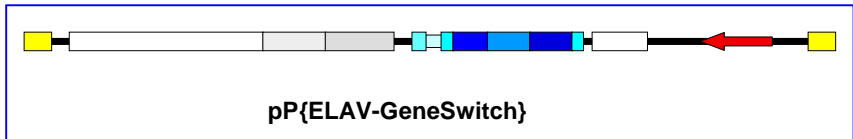

Supplement: pnas_98_22_12596__2.pdf [file pnas_98_22_12596__2.pdf]
